# Supplementary material for: Choosing a suitable support for Co3O4 as an NH3 oxidation catalyst
Source: Royal Society of Chemistry journal article supplement (doi:10.1039/c3cy00041a), 2013-01-01
Supplement: c3cy00041a.pdf [file c3cy00041a.pdf]

## Supplementary material

### Co<sub>3</sub>O<sub>4</sub>/Al<sub>2</sub>O<sub>3</sub>

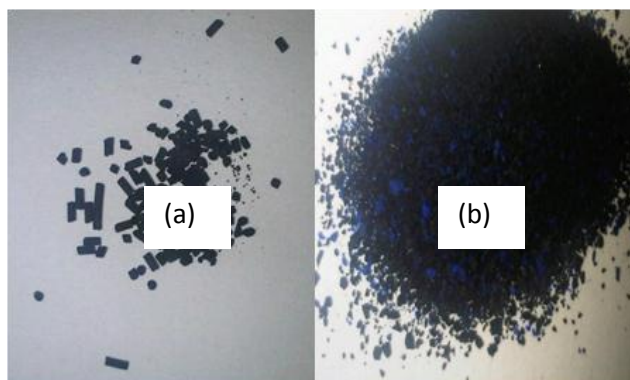

**Figure S1:** Fresh Co<sub>3</sub>O<sub>4</sub>/Al<sub>2</sub>O<sub>3</sub> pellets, (b) Spent Co<sub>3</sub>O<sub>4</sub>/Al<sub>2</sub>O<sub>3</sub> pellets (the bluish colour indicates the presence of cobalt aluminate in the spent catalyst)

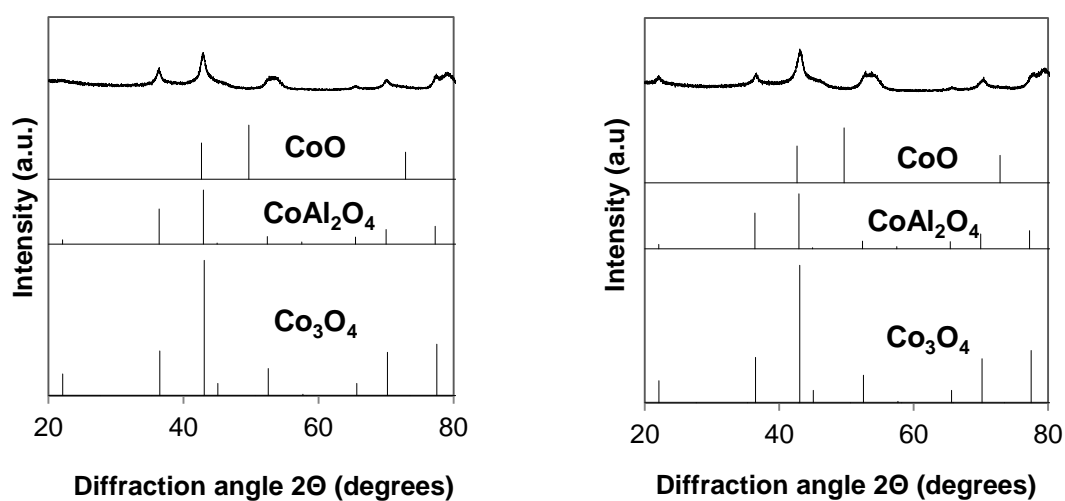

**Figure S2:** X-ray diffraction patterns of the fresh Co<sub>3</sub>O<sub>4</sub>/Al<sub>2</sub>O<sub>3</sub> (left) and spent Co<sub>3</sub>O<sub>4</sub>/Al<sub>2</sub>O<sub>3</sub> (right)

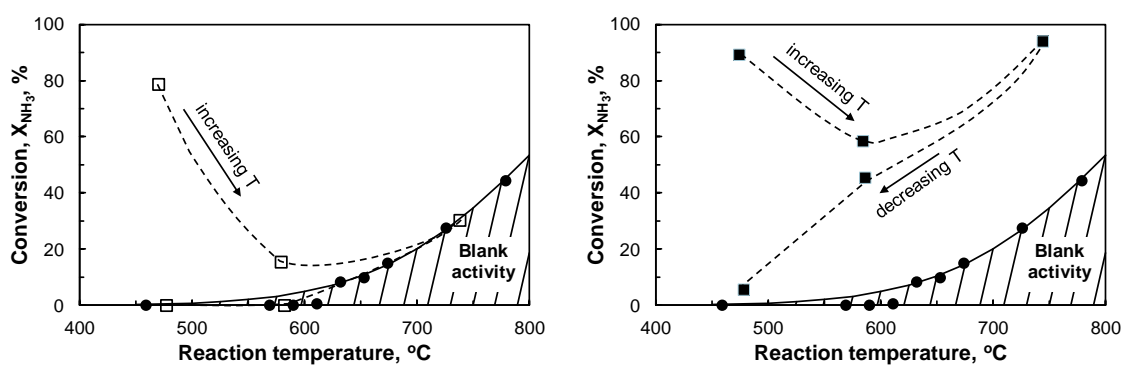

**Figure S3:** Ammonia conversion as a function of temperature for Co<sub>3</sub>O<sub>4</sub>/Al<sub>2</sub>O<sub>3</sub>

**Left:** Co<sub>3</sub>O<sub>4</sub>/Al<sub>2</sub>O<sub>3</sub>-powder (d<sub>p</sub> = 125-210 μm); SV: 1.55 mmol NH<sub>3</sub>/s/g)

**Right:** Co<sub>3</sub>O<sub>4</sub>/Al<sub>2</sub>O<sub>3</sub>-pellet (d<sub>pellet</sub> = 1 mm; h<sub>pellet</sub> = 4 mm); SV = 0.017 mmol NH<sub>3</sub>/s/g

### Co<sub>3</sub>O<sub>4</sub>/ZnAl<sub>2</sub>O<sub>4</sub>

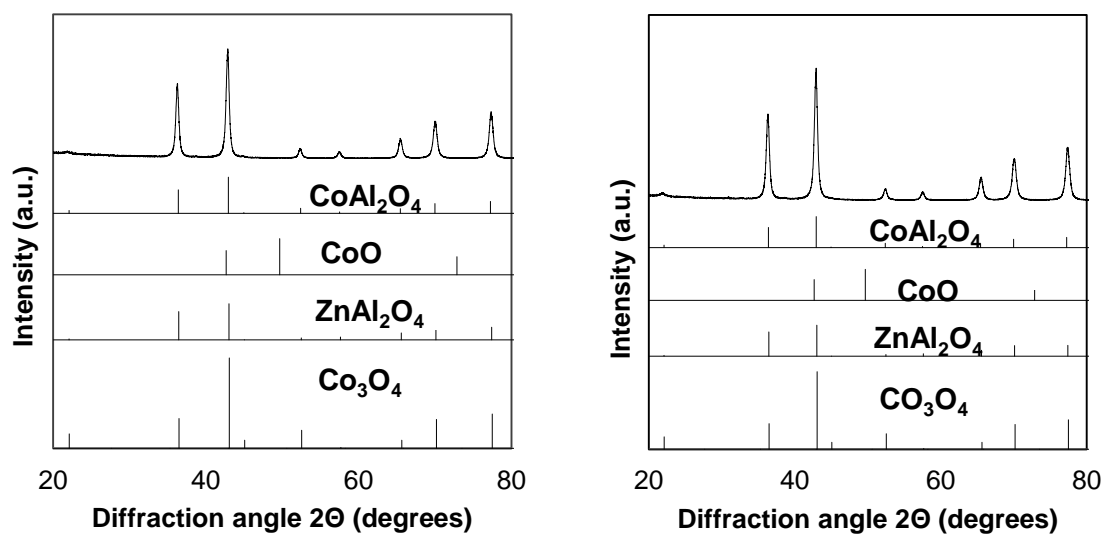

**Figure S4:** X-ray diffraction patterns of the fresh Co<sub>3</sub>O<sub>4</sub>/ZnAl<sub>2</sub>O<sub>4</sub> (left) and spent Co<sub>3</sub>O<sub>4</sub>/ZnAl<sub>2</sub>O<sub>4</sub> (right)

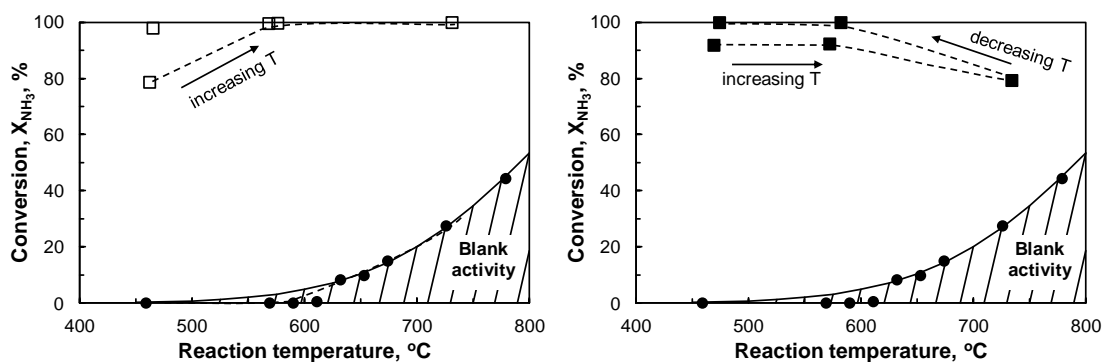

**Figure S5:** Ammonia conversion as a function of temperature for Co<sub>3</sub>O<sub>4</sub>/ZnAl<sub>2</sub>O<sub>4</sub>

**Left:** Co<sub>3</sub>O<sub>4</sub>/ZnAl<sub>2</sub>O<sub>4</sub>-powder ( $d_p = 125\text{-}210 \mu\text{m}$ ); SV: 1.46 mmol NH<sub>3</sub>/s/g)

**Right:** Co<sub>3</sub>O<sub>4</sub>/ZnAl<sub>2</sub>O<sub>4</sub>-pellet ( $d_{\text{pellet}} = 3 \text{ mm}$ ;  $h_{\text{pellet}} = 1 \text{ mm}$ ); SV = 0.017 mmol NH<sub>3</sub>/s/g)

**Co<sub>3</sub>O<sub>4</sub>/SiO<sub>2</sub>**

**Table S1:** Characterization of the fresh and spent<sup>a</sup> Co<sub>3</sub>O<sub>4</sub>/SiO<sub>2</sub> catalysts used

|                                                 |                                                             | <b>Co<sub>3</sub>O<sub>4</sub>/SiO<sub>2</sub></b> |                   |                         |
|-------------------------------------------------|-------------------------------------------------------------|----------------------------------------------------|-------------------|-------------------------|
| <b>Support</b>                                  |                                                             | Silica                                             |                   |                         |
|                                                 | d <sub>pellet</sub> , mm                                    | 2.5 x 4.5                                          |                   |                         |
|                                                 | S <sub>BET</sub> , m <sup>2</sup> /g                        | 270                                                |                   |                         |
|                                                 | V <sub>pore</sub> , cm <sup>3</sup> /g                      | 0.92                                               |                   |                         |
|                                                 | d <sub>pore</sub> , nm                                      | 12                                                 |                   |                         |
| <b>Catalyst</b>                                 | Co-loading, wt.-% <sup>b</sup>                              | 10.1                                               | 17.0              | 23.1                    |
|                                                 | Co <sub>3</sub> O <sub>4</sub> -loading, wt.-% <sup>c</sup> | 5.8                                                | 15.2              | 23.0                    |
|                                                 | S <sub>BET</sub> , m <sup>2</sup> /g                        | 193                                                | -                 | 150                     |
|                                                 | d <sub>pore</sub> , nm                                      | 16                                                 | -                 | 17                      |
|                                                 | d <sub>Co<sub>3</sub>O<sub>4</sub></sub> , nm               | 24.8 <sup>f</sup>                                  | 22.0 <sup>f</sup> | 25.5 <sup>f</sup>       |
|                                                 |                                                             |                                                    |                   | 24.4 ± 4.5 <sup>e</sup> |
| <b>Spent catalyst<sup>a</sup></b>               |                                                             | <b>II</b>                                          | <b>I</b>          | <b>I</b>                |
|                                                 | Co <sub>3</sub> O <sub>4</sub> -loading, wt.-% <sup>c</sup> | 6.0                                                | 0                 | 11.5                    |
|                                                 | CoO-loading, wt.-% <sup>c</sup>                             | 0                                                  | 3.8               | 0.2                     |
|                                                 | Co-support, wt.-% <sup>c</sup>                              | 0                                                  | 10.5              | 5.0                     |
|                                                 | S <sub>BET</sub> , m <sup>2</sup> /g                        | -                                                  | -                 | -                       |
|                                                 | d <sub>Co<sub>3</sub>O<sub>4</sub></sub> , nm               | 31 <sup>f</sup>                                    | -                 | 26 <sup>f</sup>         |
|                                                 | d <sub>CoO</sub> , nm                                       | -                                                  | 25.2 <sup>f</sup> | 12.7 <sup>f</sup>       |
| d <sub>Co<sub>2</sub>SiO<sub>4</sub></sub> , nm | -                                                           | 89 <sup>f</sup>                                    | 111 <sup>f</sup>  |                         |

<sup>a</sup> Spent catalyst after exposing a pellet of the catalyst to high temperature NH<sub>3</sub>-oxidation conditions (I: catalyst pellet recovered after exposing the catalyst to ammonia oxidation conditions at 800°C; II: catalyst pellet recovered after exposing the catalyst to ammonia oxidation conditions at 740°C followed by exposure to ammonia oxidation conditions at 580°C and 450°C).

<sup>b</sup> Co-loading as determined by elemental analysis (AAS-ICP)

<sup>c</sup> Amount of a phase present according to Rietveld refinement of the catalyst

<sup>e</sup> Distribution of sizes of Co<sub>3</sub>O<sub>4</sub> crystallites as estimated using SEM or TEM (TEM average based on counting ca. 100 crystallites)

<sup>f</sup> Average crystallite size of Co<sub>3</sub>O<sub>4</sub> crystallites using XRD

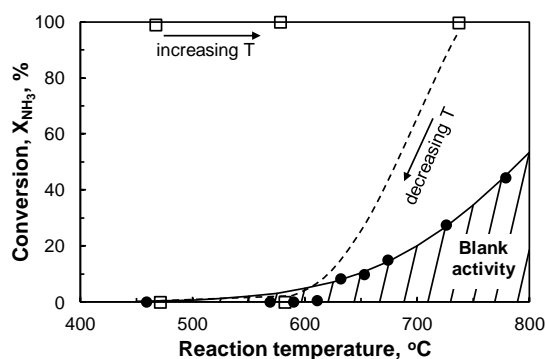

**Figure S6:** Ammonia conversion as a function of temperature for  $\text{Co}_3\text{O}_4/\text{SiO}_2$  - powder ( $d_p = 125\text{-}210 \mu\text{m}$ ; 10.1 wt.-% Co); SV: 1.50 mmol  $\text{NH}_3/\text{s/g}$ )

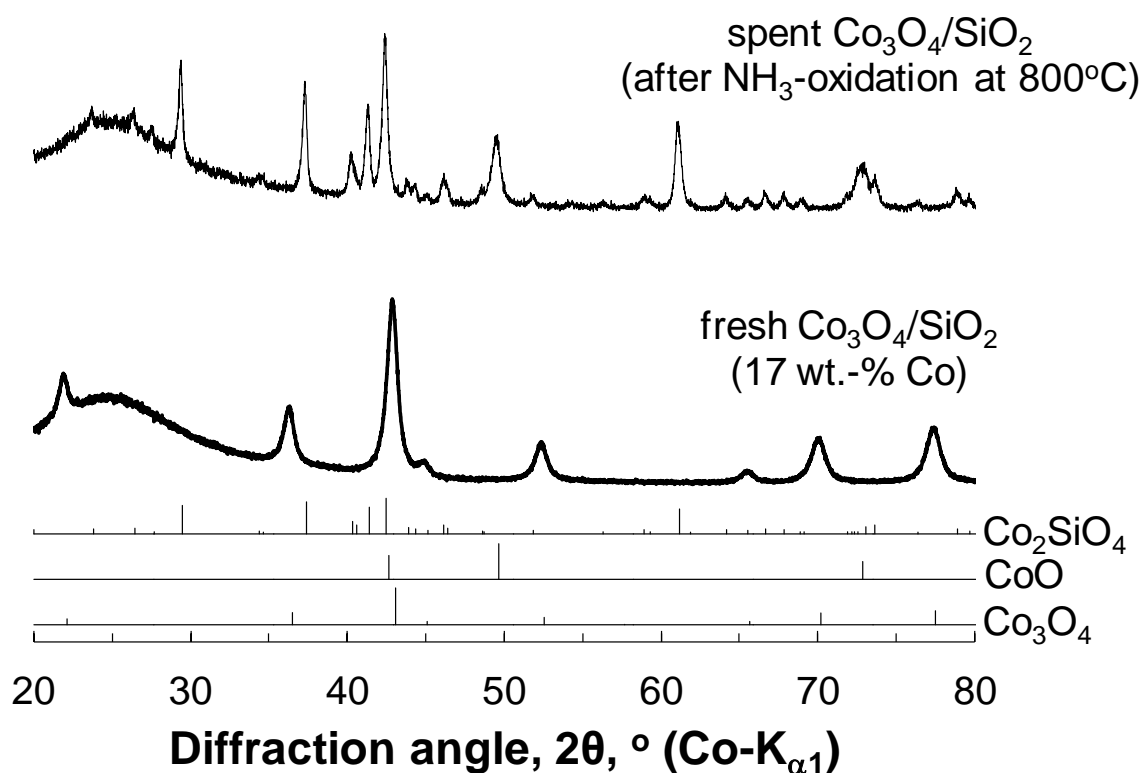

**Figure S7:** XRD-patterns of the fresh and spent  $\text{Co}_3\text{O}_4/\text{SiO}_2$  pellet containing 17.0 wt.-% cobalt (spent catalyst had been exposed to ammonia oxidation conditions at  $800^\circ\text{C}$  and a space velocity: 0.05 mmol  $\text{NH}_3/\text{s/g}$ )
